# Supplementary material for: The 89-kDa PARP1 cleavage fragment serves as a cytoplasmic PAR carrier to induce AIF-mediated apoptosis
Source: PubMed Central journal article supplement (PMC7948984; doi:10.1074/jbc.ra120.014479), 2020-11-24
Supplement: mmc1.pdf [file mmc1.pdf]

## Supporting Information

### **The 89-kDa PARP1 cleavage fragment serves as a cytoplasmic PAR carrier to induce AIF-mediated apoptosis**

Masato Mashimo<sup>1\*</sup>, Mayu Onishi<sup>1</sup>, Arina Uno<sup>1</sup>, Akari Tanimichi<sup>1</sup>, Akari Nobeyama<sup>1</sup>, Mana Mori<sup>1</sup>, Sayaka Yamada<sup>1</sup>, Shigeru Negi<sup>2</sup>, Xiangning Bu<sup>3#</sup>, Jiro Kato<sup>3</sup>, Joel Moss<sup>3</sup>, Noriko Sanada<sup>4</sup>, Ryoichi Kizu<sup>4</sup>, Takeshi Fujii<sup>1</sup>

<sup>1</sup>Department of Pharmacology, Faculty of Pharmaceutical Sciences, Doshisha Women's College of Liberal Arts, Kyotanabe, Kyoto, Japan

<sup>2</sup>Department of Clinical Pharmacy, Faculty of Pharmaceutical Sciences, Doshisha Women's College of Liberal Arts, Kyotanabe, Kyoto, Japan

<sup>3</sup>Pulmonary Branch, National Heart, Lung, and Blood Institute, National Institutes of Health, Bethesda, MD, USA

<sup>4</sup>Department of Clinical Pharmacy, Faculty of Pharmaceutical Sciences, Doshisha Women's College of Liberal Arts, Kyotanabe, Kyoto, Japan

<sup>#</sup>Present address: Department of Anatomy and Cell Biology  
GW School of Medicine and Health Science

\*Corresponding author: Masato Mashimo  
E-mail: mmashimo@dwc.doshisha.ac.jp

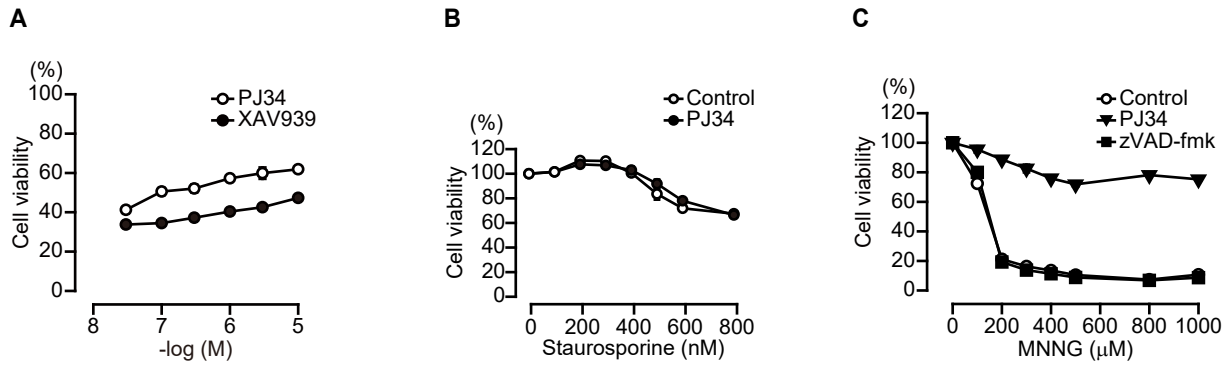

Fig. S1 Effect of PARP and caspase inhibitors on caspase-dependent and independent cell death.

A. Effect of a tankyrase inhibitor on staurosporine-induced cell death. HeLa cells were treated with PJ34 and XAV979 at the indicated concentrations for 30 min before 24-h exposure to staurosporine (300 nM). Means  $\pm$  SEM (n = 3)

B. Effect of PJ34 on staurosporine-induced cell death in HeLa cells expressing PARP1 shRNA. HeLa cells were exposed to staurosporine (6 h) at the indicated concentrations. PJ34 (10  $\mu$ M) was added for 30 min before staurosporine exposure. (means  $\pm$  SEM, n = 3)

C. PARP-dependent cell death after MNNG exposure. HeLa cells were exposed to MNNG (12 h) at the indicated concentrations. PJ34 (10  $\mu$ M) or zVAD-fmk (50  $\mu$ M) was added for 30 min before MNNG exposure. (means  $\pm$  SEM, n = 3) \*\*\* $P$  < 0.001 vs. control at above 200  $\mu$ M (two-way ANOVA with *post hoc* Tukey test)

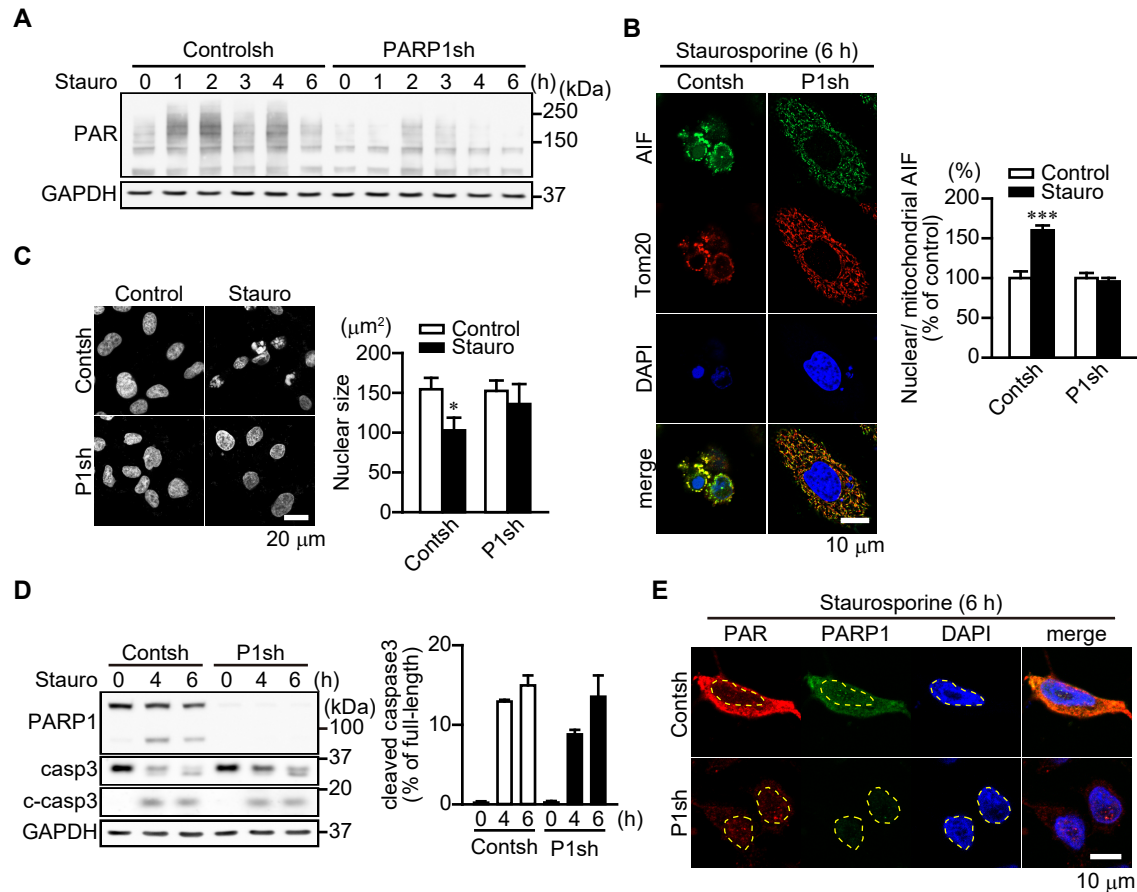

Fig. S2 PARP1-mediated PAR synthesis and AIF release after staurosporine exposure

A. PARP1-mediated PAR synthesis following incubation with 300 nM staurosporine for indicated times. HeLa cells stably expressing control or PARP1 shRNA were subjected to Western blotting using anti-PAR antibody and anti-GAPDH antibody.

B. Effect of PARP1 depletion on AIF localization. After 6-h exposure to staurosporine (300 nM), AIF localization was observed by immunocytochemistry using anti-AIF antibody. Scale bar, 10  $\mu\text{m}$ . Right graph shows the ratio of nuclear to mitochondrial AIF fluorescence. (means  $\pm$  SEM, n = 100-300 cells) \*\*\* $P$  < 0.001 vs. control (two-way ANOVA with *post hoc* Tukey test)

C. Effect of PARP1 depletion on nuclear shrinkage. After 6-h exposure to staurosporine (300 nM), nuclear size was assessed by staining with DAPI. Scale bar, 20  $\mu\text{m}$ . Right graph shows mean nuclear sizes. (means  $\pm$  SEM, n = 100-300 cells) \* $P$  < 0.05 vs. control (one-way ANOVA with *post hoc* Tukey test)

D. Effect of PARP1 depletion on PARP1 fragmentation and caspase-3 activation. After 4-h or 6-h exposure to staurosporine (300 nM), cells were subjected to Western blotting using anti-PARP1 antibody and anti-caspase-3 antibody. GAPDH was used as a loading control.

E. Effect of PARP1 depletion on PAR translocation to the cytoplasm. After 6-h exposure to staurosporine (300 nM), cells were subjected to immunocytochemistry using anti-PAR antibody (red) and anti-PARP1 antibody (green) and DAPI staining (blue). Scale bar, 10  $\mu\text{m}$ .

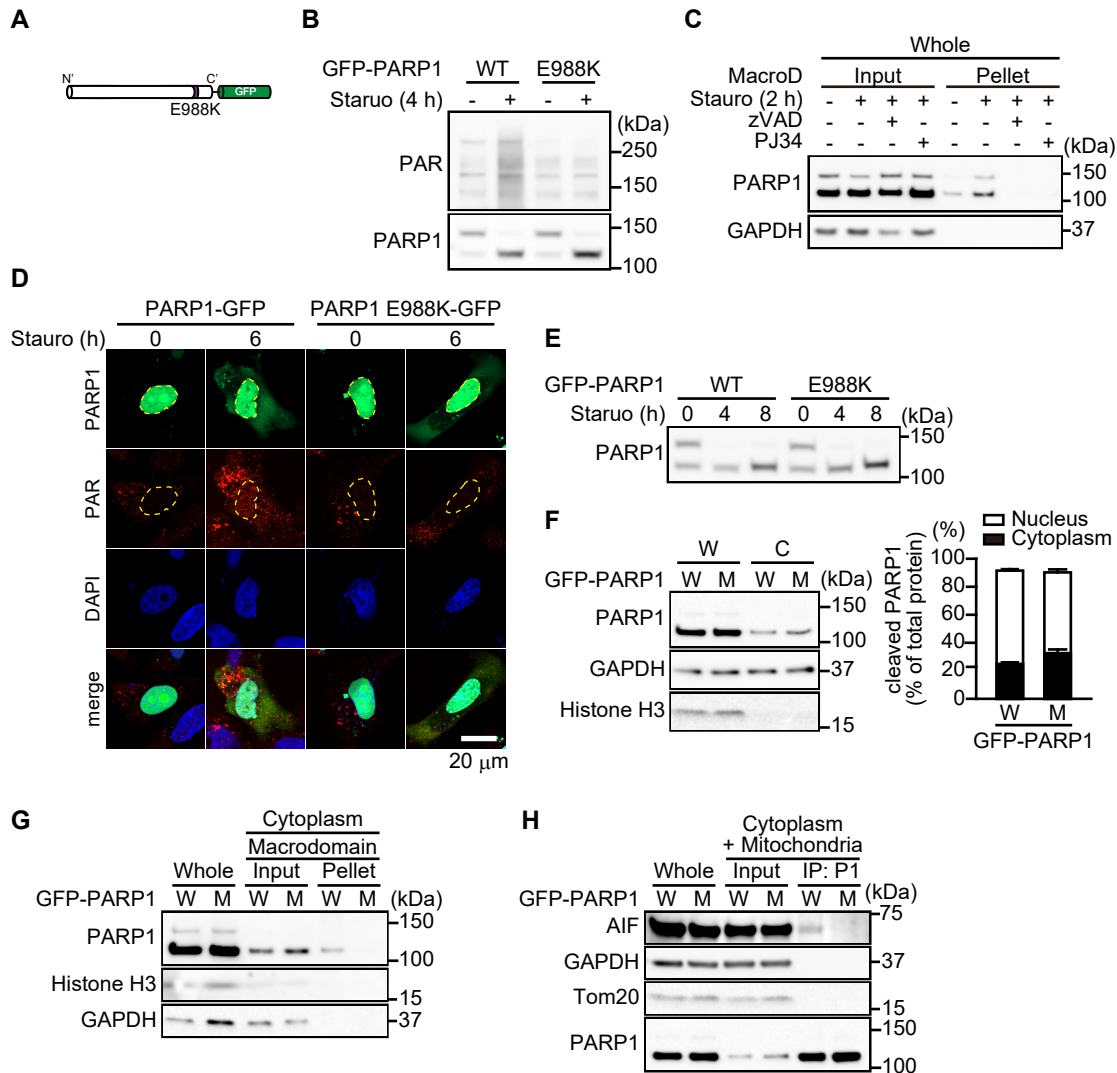

Fig. S3 Subcellular localization and poly(ADP-ribosylation) modification of PARP1 catalytically inactive mutant after staurosporine exposure

A. Schematic diagram of PARP1 E988K-GFP construct.

B. PAR synthesis by PARP1-GFP WT and E988K in HeLa cells expressing PARP1 shRNA. Cells were subjected to Western blotting using anti-PAR antibody and anti-PARP1 antibody.

C. Trans-automodification of PARP1 E988K-GFP after staurosporine exposure in HeLa cells. HeLa cells expressing PARP1 E988K-GFP was exposed to staurosporine (300 nM) for 2 h after treatment with zVAD-fmk (50  $\mu$ M) or PJ34 (10  $\mu$ M) and then subjected to GST pull-down assay using GST-macrodomein. PARP1-GFP was detected in Western blotting with anti-turboGFP antibody. GAPDH was used as a whole cell marker.

D. Localization of PARP1 E988K-GFP after 6-h exposure to staurosporine. HeLa cells were exposed to 300 nM staurosporine for 6 h. Cells were subjected to immunocytochemistry using anti-PAR antibody (red) and DAPI staining (blue). Yellow lines indicate the position of nuclei. Scale bar, 20  $\mu$ m.

E. Fragmentation of PARP1 E988K-GFP following long-term exposure to staurosporine. HeLa cells expressing PARP1 shRNA with PARP1-GFP (WT) or PARP1 E988K-GFP (E988K) were exposed to staurosporine (300 nM) for indicated times. PARP1-GFP was detected by Western blotting with anti-turboGFP antibody.

F. Cytoplasmic localization of cleaved PARP1 E988K-GFP after exposure to staurosporine. HeLa cells expressing PARP1 shRNA with PARP1-GFP (W) or PARP1 E988K-GFP (M) were exposed to staurosporine (300 nM) for 8 h. PARP1-GFP was detected by Western blotting with anti-turboGFP antibody. The bar graph represents the ratio of cleaved PARP1 to total PARP1 in nuclear (white) and cytoplasmic (black) fractions, assessed with pooled densitometric data (means  $\pm$  SEM, n = 3).

G. Cleaved form of PARP1 E988K-GFP is not auto-modified by PAR in the cytoplasm. HeLa cells expressing PARP1 shRNA with PARP1-GFP (W) or PARP1 E988K-GFP (M) were exposed to 300 nM staurosporine for 8 h without or with PJ34 (10  $\mu$ M). After subcellular fractionation, cytoplasmic fractions were subjected to GST pull-down assay using GST-macrodomein. Histone H3 and GAPDH were used as nuclear and cytoplasmic markers, respectively.

H. Cleaved form of PARP1 E988K-GFP does not bind AIF via PAR polymers in the cytoplasm. HeLa cells expressing PARP1 shRNA with PARP1-GFP (W) or PARP1 E988K-GFP (M) were exposed to staurosporine (300 nM) for 8 h without or with PJ34 (10  $\mu$ M). After subcellular fractionation, cytoplasmic/mitochondrial fractions were subjected to immunoprecipitation with anti-turboGFP antibody and then Western blotting using anti-AIF antibody. GAPDH and Tom20 were used as cytoplasmic and mitochondrial markers, respectively.
